# Supplementary material for: Fabrication of monodisperse nitrogen-doped carbon double-shell hollow nanoparticles for supercapacitors
Source: Royal Society of Chemistry journal article supplement (doi:10.1039/c7ra03077k), 2017-01-01
Supplement: c7ra03077k1.pdf [file c7ra03077k1.pdf]

Supporting Information for

**Fabrication of monodisperse nitrogen-doped carbon  
double-shell hollow nanoparticles for supercapacitors**

Juyoung Yun, Jaemoon Jun, Jungsup Lee, Jaehoon Ryu, Kisu Lee, Haejun Ryu and Jyongsik  
Jang\*

\*School of Chemical and Biological Engineering, College of Engineering, Seoul National  
University (SNU), Seoul, Korea. Fax: 82 2 888 1604; Tel: 82 2 880 7069; E-mail:  
[jsjang@plaza.snu.ac.kr](mailto:jsjang@plaza.snu.ac.kr)

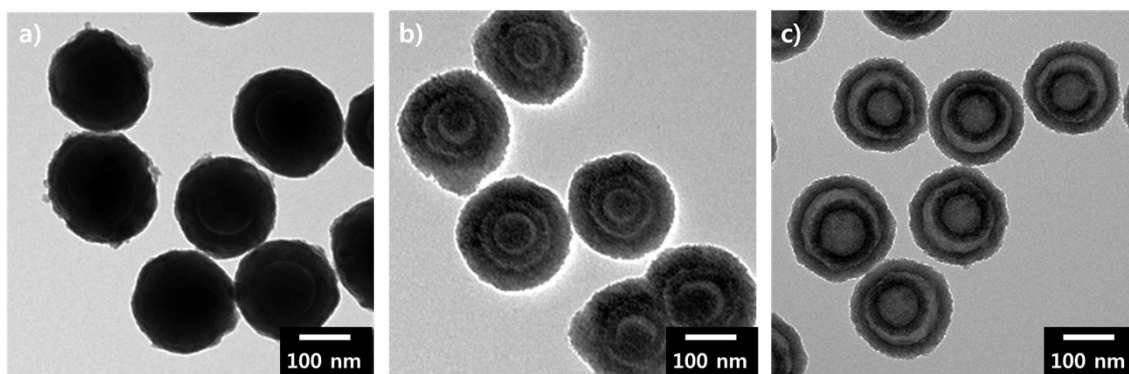

**Figure S1.** TEM images of a) STST CSNPs, b) intermediate structured ST DS-HNPs, and c) ST DS-HNPs

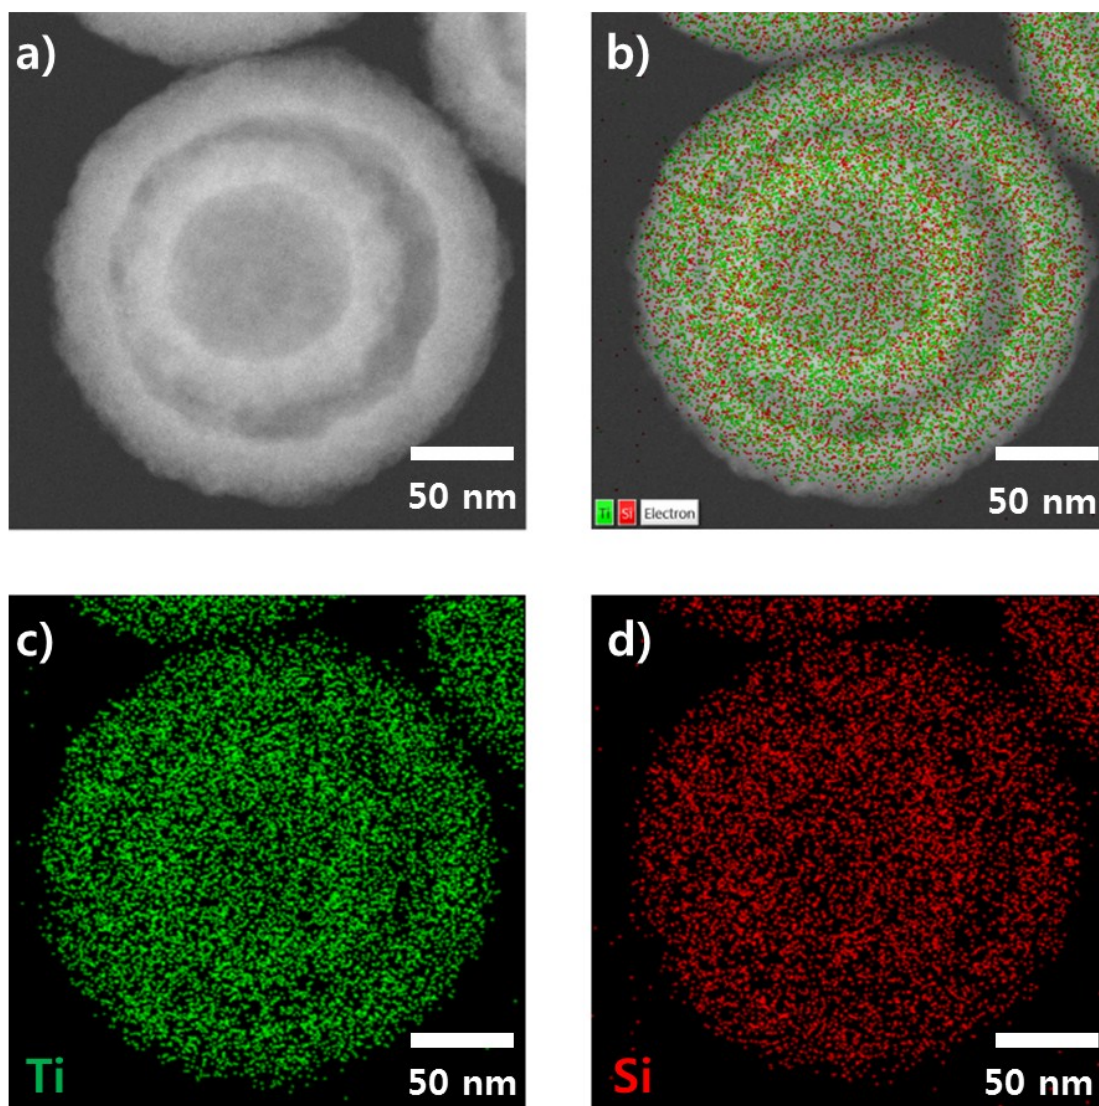

**Figure S2.** a) Scanning transmission electron microscopy (STEM) image of a silica/titania double-shell nanoparticle (ST DS-HNP) and the corresponding elemental dot maps for b) Ti and Si, c) Ti and d) Si.

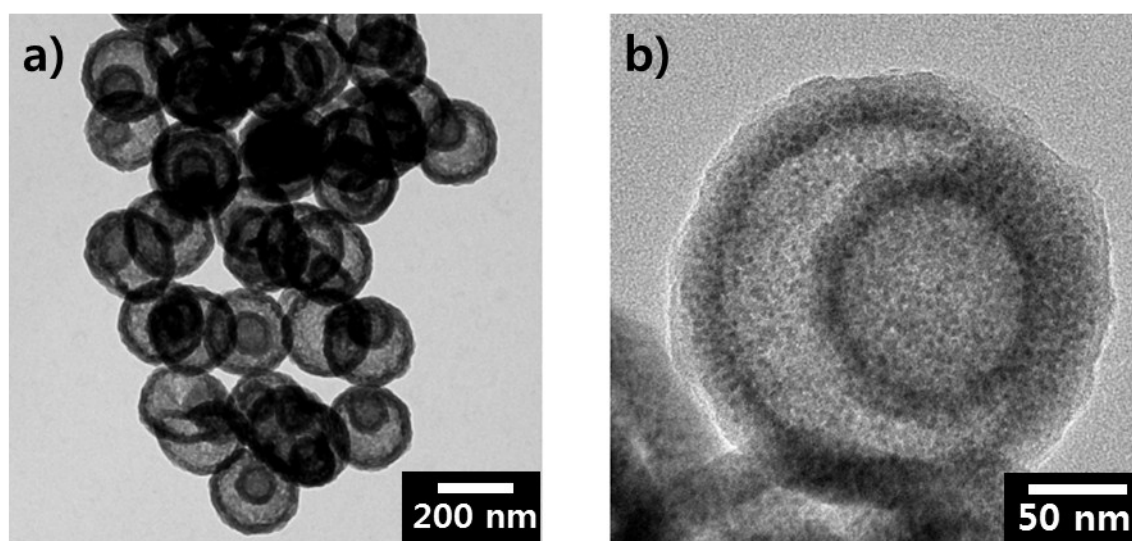

**Figure S3.** a) Transmission electron microscopy (TEM) image and b) high-resolution TEM (HR-TEM) image of nitrogen-doped carbon double-shell nanoparticles (NC DS-HNPs).

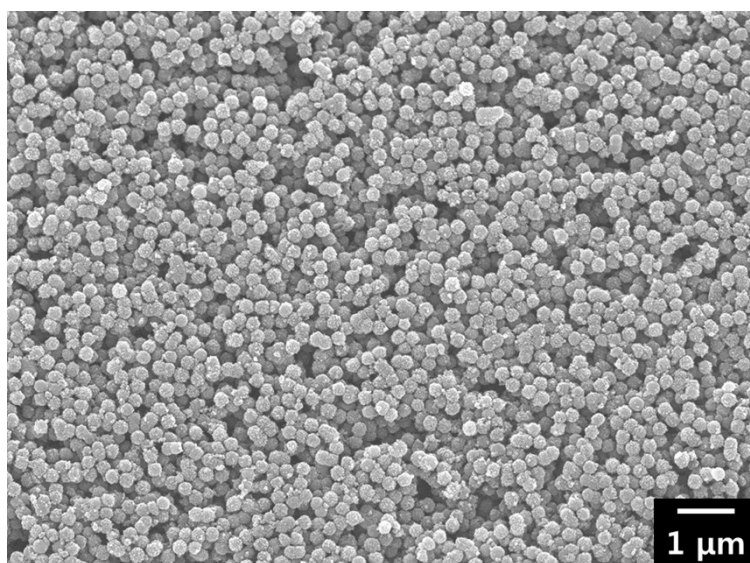

**Figure S4.** Low-magnification FE-SEM image of NC DS-HNPs

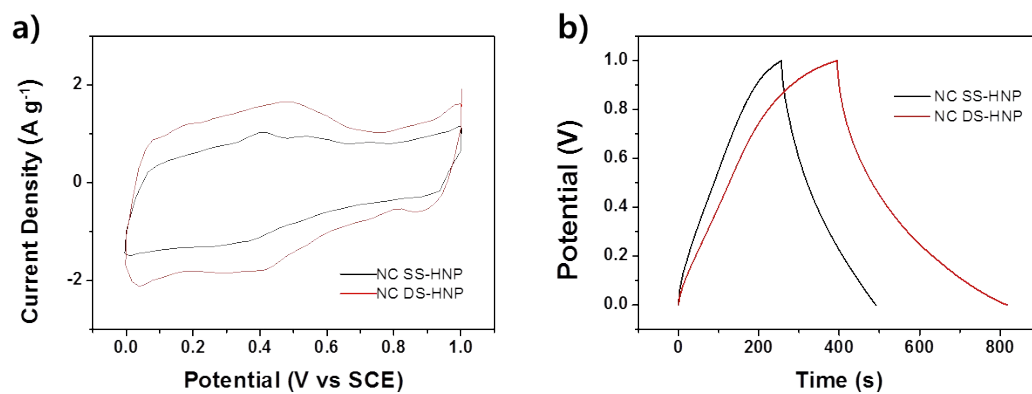

**Figure S5.** a) CV curves of NC SS-HNP and NC DS-HNP at a scan rate 20 mV s<sup>-1</sup> in 1M H<sub>2</sub>SO<sub>4</sub> solution and b) charge-discharge curves of NC SS-HNP and NC DS-HNP at current density of 0.5 A g<sup>-1</sup>.

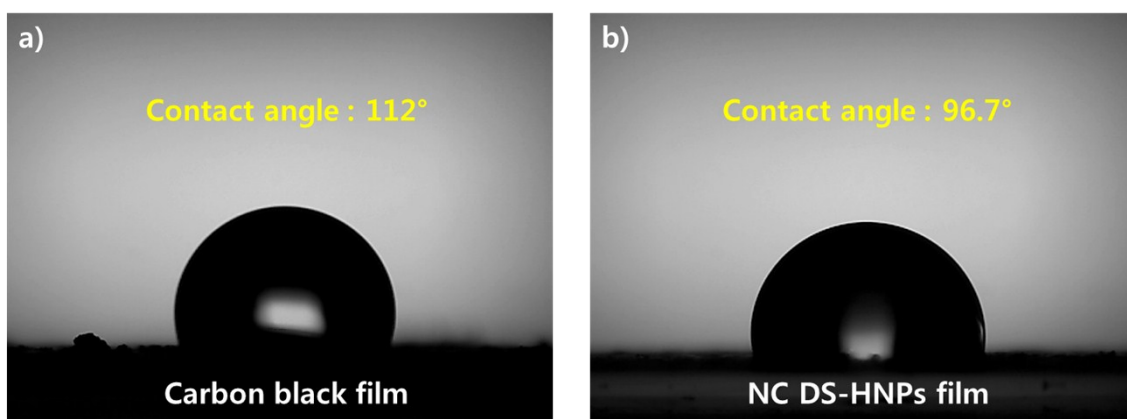

**Figure S6.** Water contact angle of a) carbon black film and b) NC DS-HNPs film.

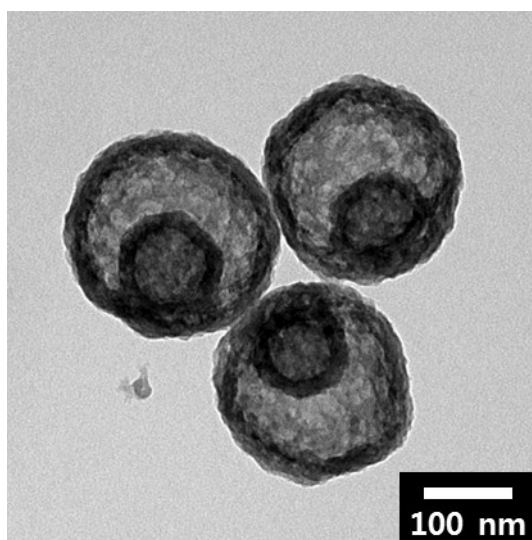

**Figure S7.** TEM image of NC DS-HNPs after 5000 cycles at a current density of  $1 \text{ A g}^{-1}$

1

**Table S1** Pore characteristics of NC SS-HNPs and NC DS-HNPs.

| Sample     | $S_{\text{BET}}$ ( $\text{m}^2 \text{g}^{-1}$ ) | $S_{\text{Langmuir}}$ ( $\text{m}^2 \text{g}^{-1}$ ) | $V_{\text{pore}}$ ( $\text{cm}^3 \text{g}^{-1}$ ) | $D_{\text{ave}}$ (nm) |
|------------|-------------------------------------------------|------------------------------------------------------|---------------------------------------------------|-----------------------|
| NC SS-HNPs | 511.21                                          | 702.83                                               | 0.88                                              | 7.4                   |
| NC DS-HNPs | 873.52                                          | 1198.77                                              | 2.86                                              | 13.9                  |
